# Supplementary material for: Prazosin-Conjugated Matrices Based on Biodegradable Polymers and α-Amino Acids—Synthesis, Characterization, and in Vitro Release Study
Source: MDPI journal article supplement (doi:10.3390/molecules200814533), 2015-08-12
Supplement: s1 [file s1]

## Supplementary Information

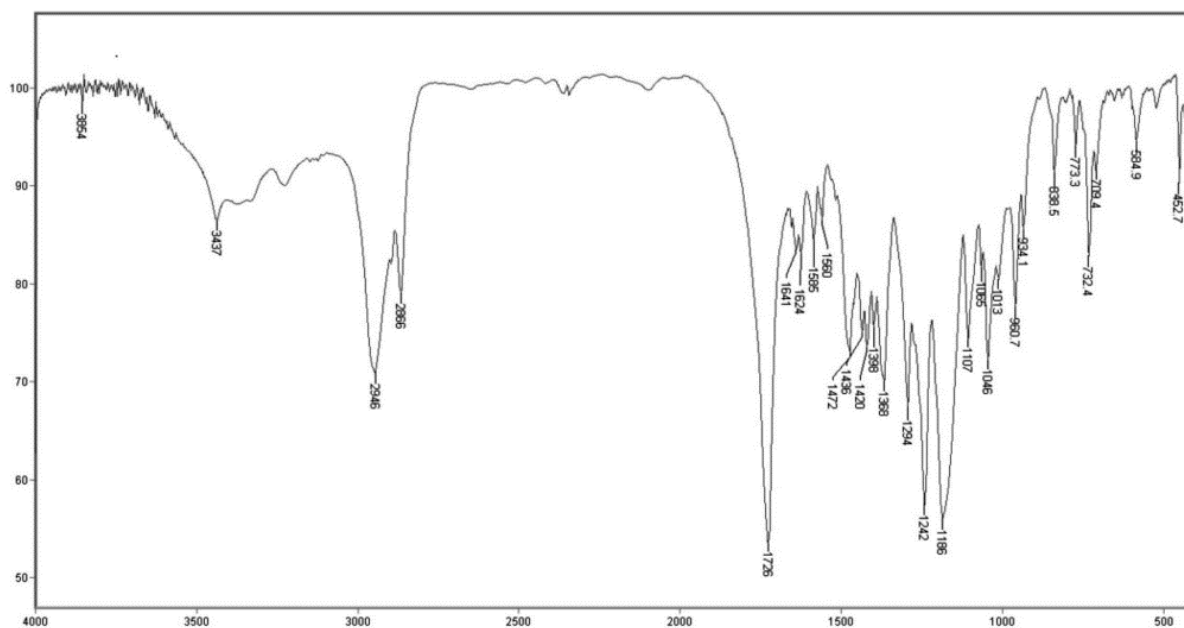

**Figure S1.** FTIR spectrum of prazosin-PCL/Arg conjugate.

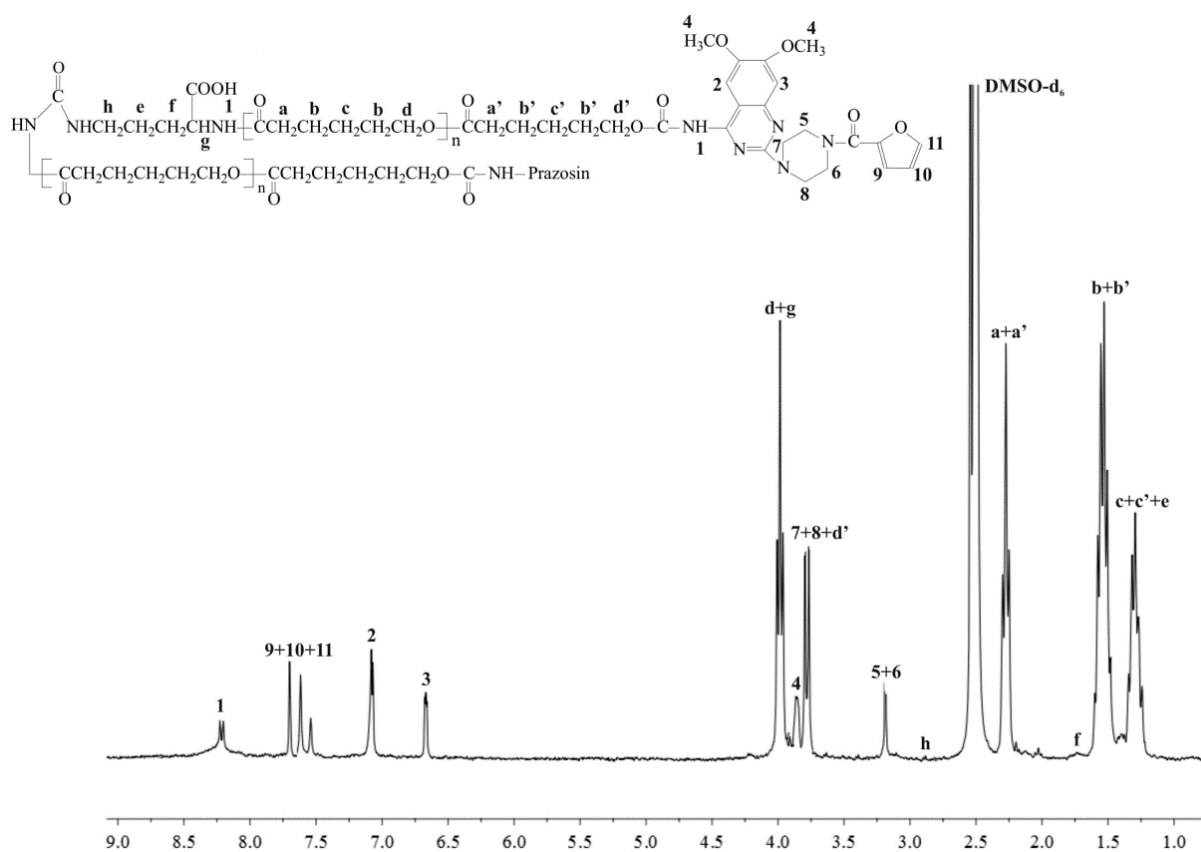

**Figure S2.**  $^1\text{H}$  NMR spectrum of the prazosin-PCL/Citr conjugate.

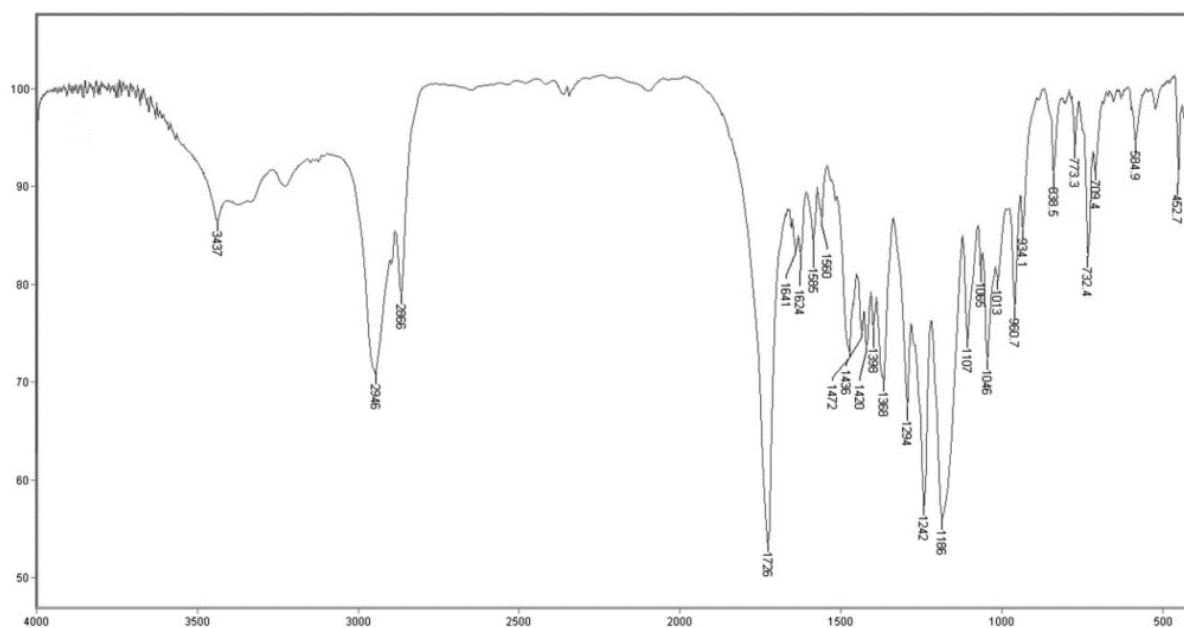

**Figure S3.** FTIR spectrum of prazosin-PCL/Citr conjugate.

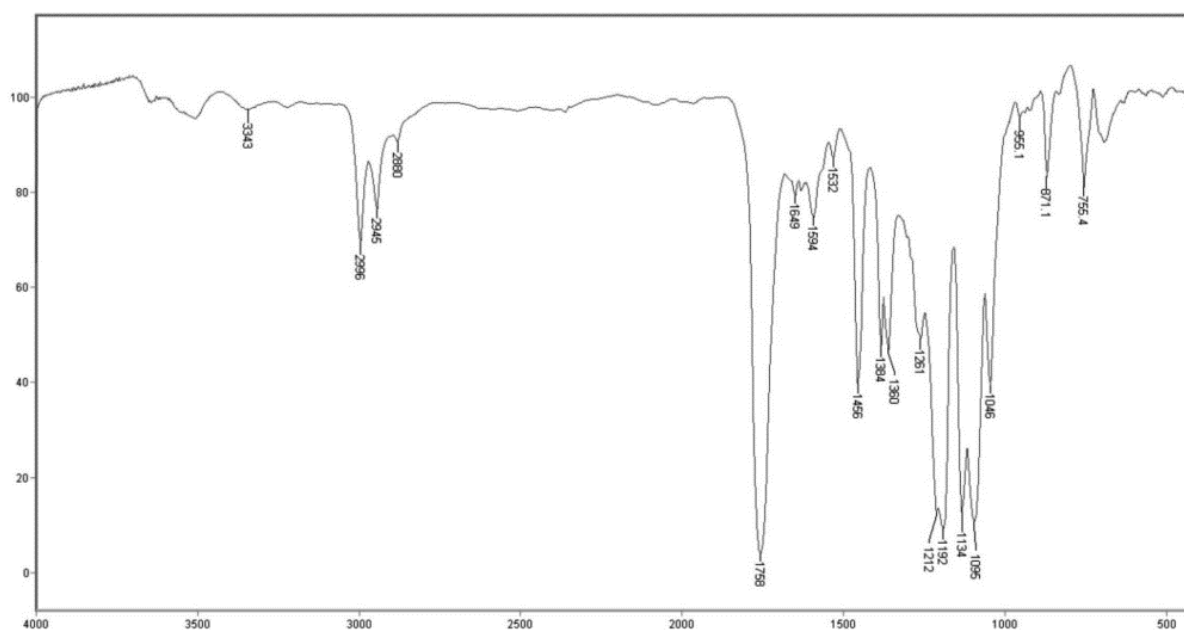

**Figure S4.** FTIR spectrum of prazosin-PLLA/Arg conjugate.

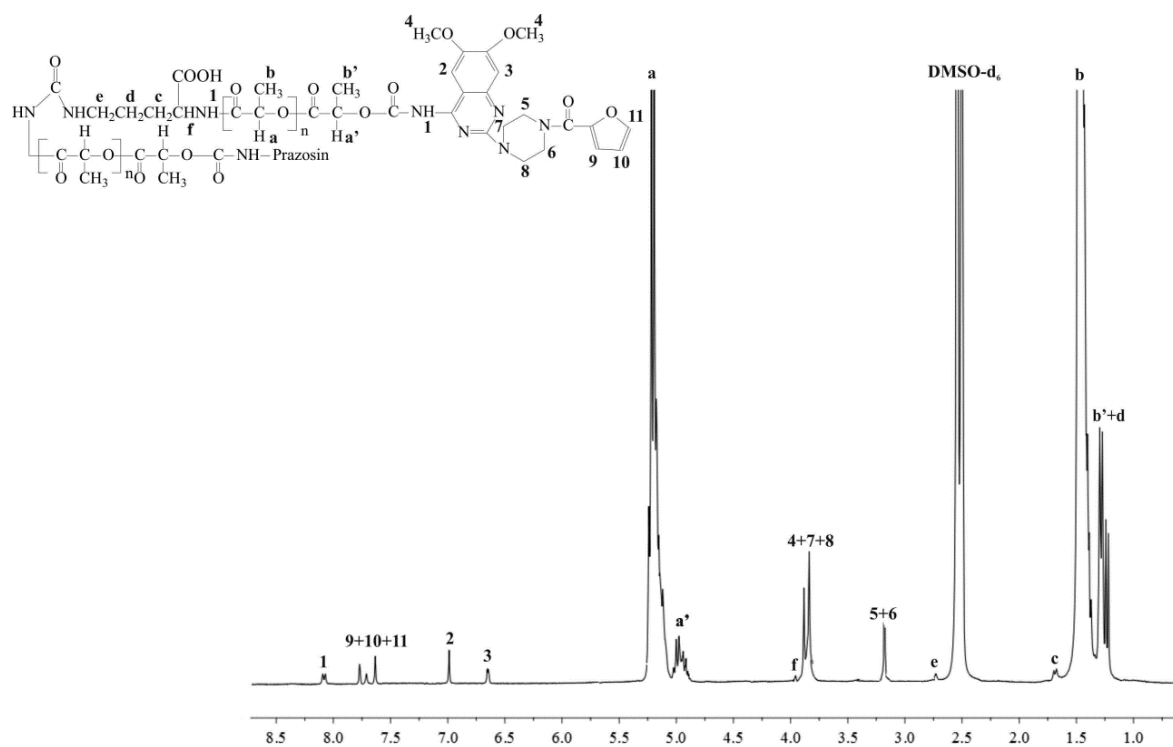

**Figure S5.**  $^1\text{H}$  NMR spectrum of the prazosin-PLLA/Citr conjugate.

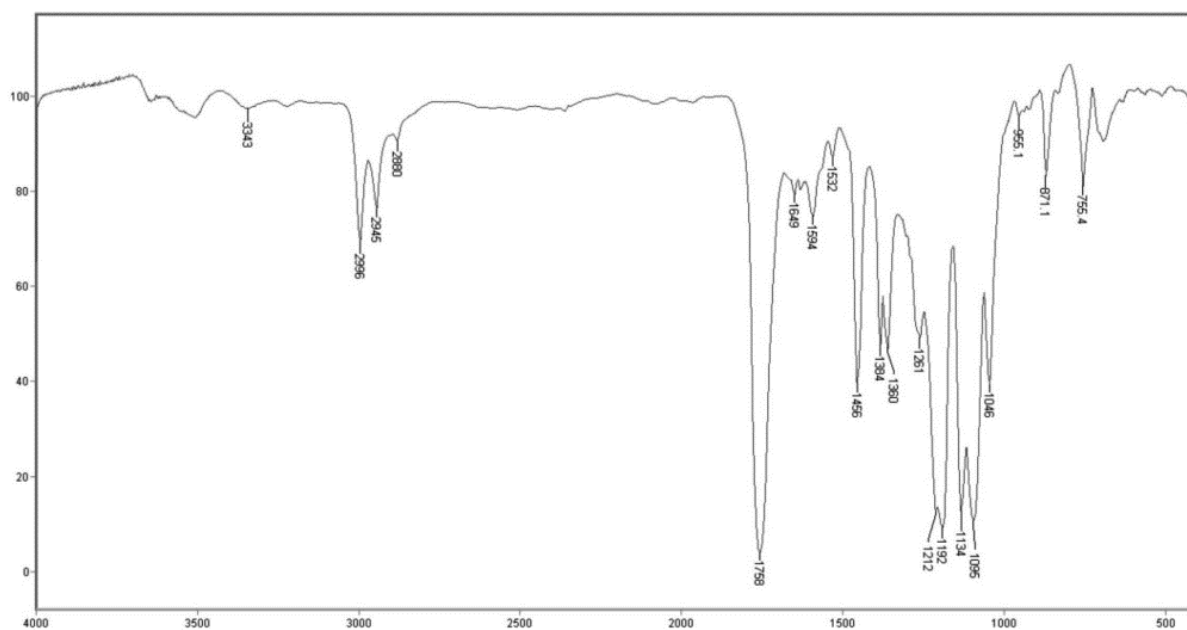

**Figure S6.** FTIR spectrum of prazosin-PLLA/Citr conjugate.

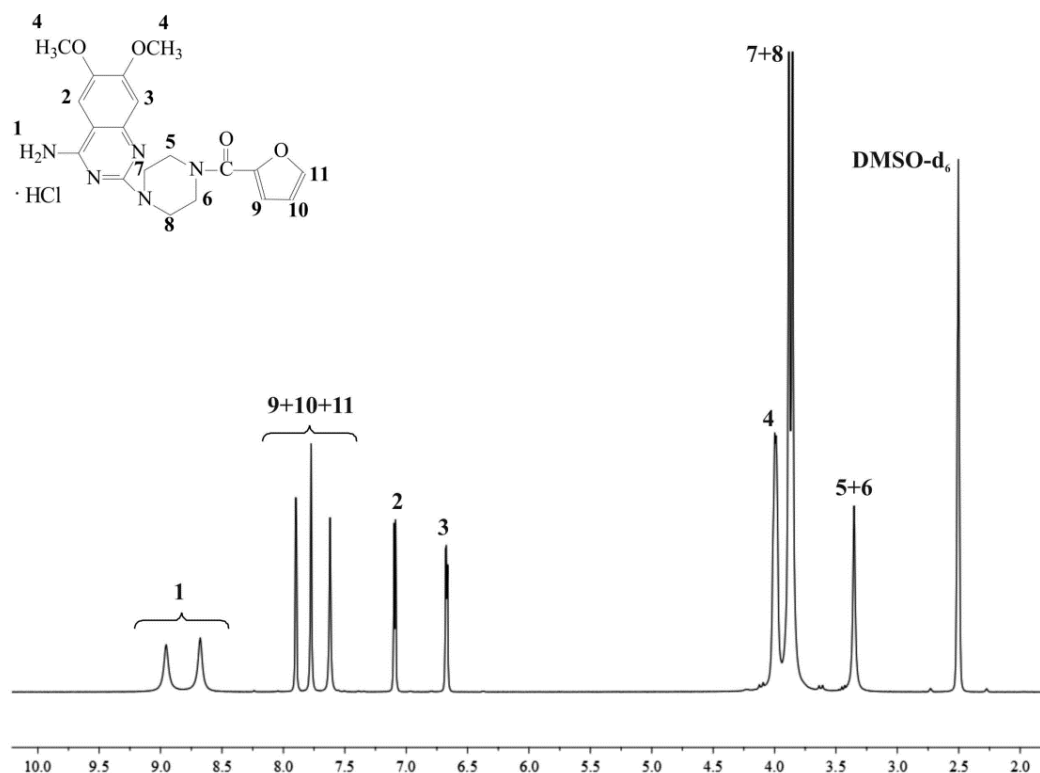

**Figure S7.** <sup>1</sup>H NMR spectrum of the prazosin hydrochloride.

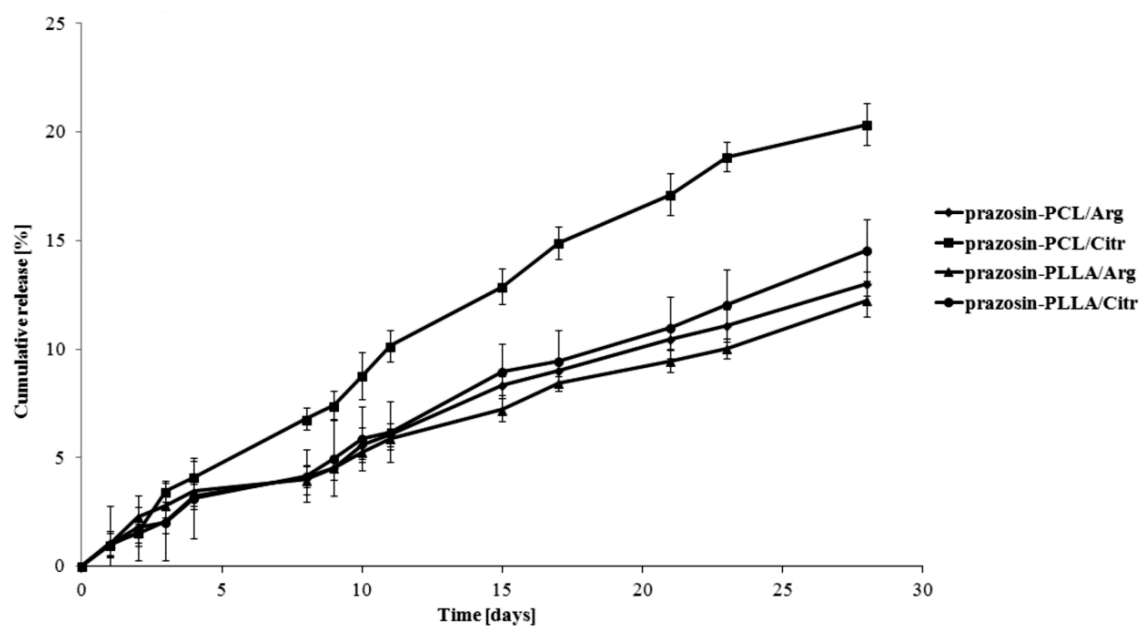

**Figure S8.** Release profile of prazosin from the synthesized conjugates (pH 7.4 ± 0.5).

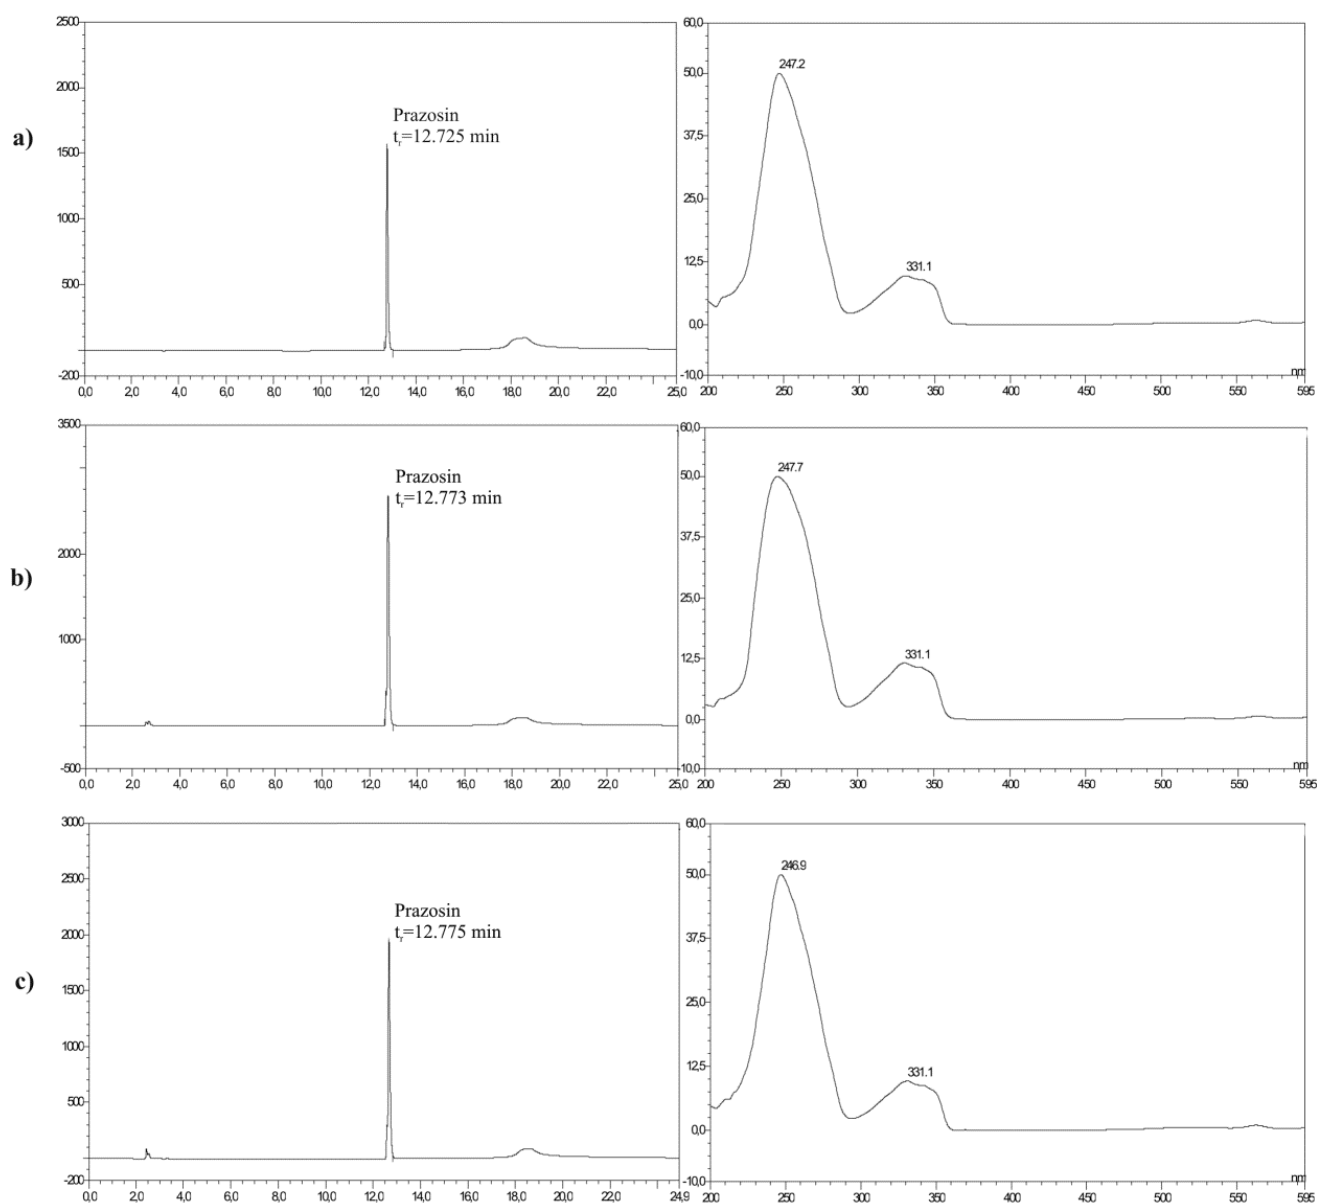

**Figure S9.** The HPLC chromatogram and UV spectrum of prazosin released from prazosin-PCL/Arg conjugate (before (a); after 9 (b) and 28 days (c) of degradation at pH  $7.00 \pm 0.05$ ).
